# Supplementary material for: Carnivore hotspots in Peninsular Malaysia and their landscape attributes
Source: PubMed Central journal article supplement (PMC5884492; doi:10.1371/journal.pone.0194217), 2018-04-04
Supplement: pone.0194217.s011.pdf [file pone.0194217.s011.pdf]

**S1 Table.** Model selection results to identify landscape variables associated with spatial clustering of carnivore records based on weighted ranking of IUCN red list categories, Peninsular Malaysia, 1948–2014.

| Model no. and variables <sup>a</sup>                                   | AIC <sub>c</sub> <sup>b</sup> | ΔAIC <sub>c</sub> <sup>c</sup> | K <sup>d</sup> | Adjusted model R <sup>2</sup> |
|------------------------------------------------------------------------|-------------------------------|--------------------------------|----------------|-------------------------------|
| 1. DCap + RdDens + (DCap × RdDens) + NatHabProp + Elevation            | 307.64                        | 0                              | 6              | 0.62                          |
| 2. DCap + RdDens + (DCap × RdDens) + PopDens + NatHabProp + Elevation  | 309.22                        | 1.58                           | 7              | 0.62                          |
| 3. DCap + RdDens + (DCap × RdDens) + NatHabProp + Elevation + ProxTown | 309.80                        | 2.16                           | 7              | 0.62                          |
| 4. DCap + RdDens + (DCap × RdDens) + PopDens + Elevation               | 310.08                        | 2.44                           | 6              | 0.61                          |
| 5. DCap + RdDen + (DCapP × RdDens) + NatHabProp                        | 310.19                        | 2.55                           | 5              | 0.61                          |
| 6. DCap + RdDens + (DCap × RdDens) + PopDens                           | 310.46                        | 2.82                           | 5              | 0.62                          |
| 7. DCap + RdDens + (DCap × RdDens)                                     | 310.84                        | 3.20                           | 4              | 0.61                          |

<sup>a</sup> DCap = distance (m) to capital city (ln transformed; sampling covariate).

RdDens = Density of improved roads (km/km<sup>2</sup>) measured within a 15-km radius moving window.

NatHabProp = Proportion of pixels with natural land cover measured within a 15-km radius moving window.

Elevation = elevation (m).

PopDens = human population size per 968- x 968-m grid cell (approximately 1 km<sup>2</sup>).

ProxTown = proximity (m) to nearest town or village.

<sup>b</sup> Bias-corrected Akaike's information criterion .

<sup>c</sup> Difference in AIC<sub>c</sub> compared with best model.

<sup>d</sup> Number of estimated parameters.
