# Supplementary material for: Carnivore hotspots in Peninsular Malaysia and their landscape attributes
Source: PLoS One. 2018 Apr 4;13(4):e0194217. doi: 10.1371/journal.pone.0194217 (PMC5884492; doi:10.1371/journal.pone.0194217)
Supplement: S2 Appendix — (XLSX) [file pone.0194217.s002.xlsx]

## Sheet: Sheet1
Longitude	Latitude	Family	Species	Year of survey	State	Habitat	Study area	IUCN status	2015 RedList weight	References
102.13	3.72493	Viverridae	banded civet	1968	Pahang	forest (300 to >740m)	Krau WR	NT	2	Medway (1972)
102.779	3.58109	Viverridae	banded civet	1989	Pahang	Not described	Batu Bebok, Maran	NT	2	Bukit Ringitt Museum
101.534	5.49517	Viverridae	banded civet	1995	Perak	forest (300 to >740m)	Sungai Singgor, Temenggor FR Hulu Perak	NT	2	Ratnam et al (1995)
102.531	4.5715	Viverridae	banded civet	2000	Pahang	forest (<300m)	Taman negara	NT	2	Kawanishi et al. (1999)
102.053	3.60449	Viverridae	banded civet	2003	Pahang	forest (<300m)	Lakum FR	NT	2	Lim et al. (2008)
101.454	5.5773	Viverridae	banded civet	2010	Perak	forest (300 to >740m)	Belum - Temenggor FR	NT	2	Mohamad et al. (2015)
102.55	5.08336	Viverridae	banded civet	2012	Terengganu	forest (200-740m)	Kenyir Wildlife Corridor	NT	2	Hedges et al. (2013)
102.13	3.72493	Prionodontidae	banded linsang	1968	Pahang	forest (300 to >740m)	Krau WR	LC	1	Medway (1972)
101.718	3.54345	Prionodontidae	banded linsang	1975	Selangor	forest (300 to >740m)	Bukit Kutu WR, Hulu Selangor	LC	1	Lim et al. (1999c)
102.905	3.41047	Prionodontidae	banded linsang	1994	Pahang	forest (<300m)/ swamp	Tasek Cini NR	LC	1	Lim et al. (1999a)
102.307	2.98771	Prionodontidae	banded linsang	1995	Negeri Sembilan	forest (<300m)	Pasoh FR	LC	1	Lim et al. (1995)
100.968	5.99317	Prionodontidae	banded linsang	1996	Kedah	forest (300 to >740m)	Ulu Muda FR	LC	1	Norsham et al. (1999)
101.534	5.49517	Prionodontidae	banded linsang	1998	Perak	forest (300 to >740m)	Sungai Singgor, Temenggor FR Hulu Perak	LC	1	Ratnam et al (1995)
103.149	4.93523	Prionodontidae	banded linsang	2001	Terengganu	forest (50-740m)	Jerengau FR	LC	1	Azlan, Sharma (2006a)
101.861	3.07018	Prionodontidae	banded linsang	2003	Selangor	forest (50-740m)	Sungai Lalang FR	LC	1	Lim et al. (2009)
101.817	5.57676	Prionodontidae	banded linsang	2005	Kelantan	forest (50-740m)	Gunung Basor FR	LC	1	Rayan (2007)
101.365	5.34377	Prionodontidae	banded linsang	2008	Perak	forest (300 to >740m)	Temengor FR	LC	1	Magintan et al. (2010)
102.55	5.08336	Prionodontidae	banded linsang	2012	Terengganu	forest (200-740m)	Kenyir Wildlife Corridor	LC	1	Hedges et al. (2013)
102.716	5.19747	Prionodontidae	banded linsang	2012	Terengganu	forest (200-740m)	Kenyir Wildlife Corridor	LC	1	Hedges et al. (2013)
102.13	3.72493	Viverridae	binturong	1968	Pahang	forest (300 to >740m)	Krau WR	VU	3	Medway (1972)
101.718	3.54345	Viverridae	binturong	1975	Selangor	forest (300 to >740m)	Bukit Kutu WR, Hulu Selangor	VU	3	Lim et al. (1999c)
102.247	3.67068	Viverridae	binturong	1986	Pahang	forest (<300m)	Kuala Lompat, Krau WR	VU	3	Lambert (1990)
101.955	5.02604	Viverridae	binturong	1986	Kelantan	forest (300 to >740m)	Sungai Nenggiri	VU	3	Yatim et al. (1986)
100.968	5.99317	Viverridae	binturong	1996	Kedah	forest (300 to >740m)	Ulu Muda FR	VU	3	Norsham et al. (1999)
102.531	4.5715	Viverridae	binturong	2000	Pahang	forest (<300m)	Taman negara	VU	3	Kawanishi et al. (1999)
102.13	3.72493	Viverridae	binturong	2000	Pahang	forest (300 to >740m)	Krau WR	VU	3	Othman and Lim (2000)
103.149	4.93523	Viverridae	binturong	2001	Terengganu	forest (50-740m)	Jerengau FR	VU	3	Azlan, Sharma (2006a)
101.817	5.57676	Viverridae	binturong	2005	Kelantan	forest (50-740m)	Gunung Basor FR	VU	3	Rayan (2007)
101.365	5.34377	Viverridae	binturong	2008	Perak	forest (300 to >740m)	Temengor FR	VU	3	Magintan et al. (2010)
101.454	5.5773	Viverridae	binturong	2010	Perak	forest (300 to >740m)	Belum - Temenggor FR	VU	3	Mohamad et al. (2015)
102.55	5.08336	Viverridae	binturong	2012	Terengganu	forest (200-740m)	Kenyir Wildlife Corridor	VU	3	Hedges et al. (2013)
102.716	5.19747	Viverridae	binturong	2012	Terengganu	forest (200-740m)	Kenyir Wildlife Corridor	VU	3	Hedges et al. (2013)
102.306	3.42067	Felidae	clouded leopard	1992	Pahang	forest (<300m)	Kemasul	VU	3	Laidlaw (2000)
102.531	4.5715	Felidae	clouded leopard	2000	Pahang	forest (<300m)	Taman negara	VU	3	Kawanishi et al. (1999)
103.149	4.93523	Felidae	clouded leopard	2001	Terengganu	forest (50-740m)	Jerengau FR	VU	3	Azlan, Sharma (2006)
101.817	5.57676	Felidae	clouded leopard	2005	Kelantan	forest (50-740m)	Gunung Basor FR	VU	3	Rayan (2007)
101.365	5.34377	Felidae	clouded leopard	2008	Perak	forest (300 to >740m)	Temengor FR	VU	3	Magintan et al. (2010)
103.34	2.53765	Felidae	clouded leopard	2010	Johor	forest (50-740m)	Northern Endau Rompin NP	VU	3	Gumal et al. (2014)
101.454	5.5773	Felidae	clouded leopard	2010	Perak	forest (300 to >740m)	Belum - Temenggor FR	VU	3	Mohamad et al. (2015)
102.13	3.72493	Viverridae	common palm civet	1968	Pahang	forest (<300m)	Krau WR	LC	1	Medway (1972)
102.406	4.37718	Viverridae	common palm civet	1973	Pahang	forest (<300m)	Kuala Tahan, Taman Negara	LC	1	Lim et al. (1989)
101.718	3.54345	Viverridae	common palm civet	1975	Selangor	forest (300 to >740m)	Bukit Kutu WR, Hulu Selangor	LC	1	Lim et al. (1999c)
101.844	3.0864	Viverridae	common palm civet	1983	Selangor	forest (50-740m)	Hulu Langat	LC	1	Yatim (1983)
100.648	4.2003	Viverridae	common palm civet	1984	Perak	forest (<300m)/heath forest	Tanjung Hantu FR	LC	1	Yatim (1984)
99.6715	6.37964	Viverridae	common palm civet	1984	Langkawi	forest (<300m)/heath forest	Gunung Machinchang	LC	1	Yatim (1984)
102.531	4.5715	Viverridae	common palm civet	1984	Pahang	forest (50-740m)	Taman negara	LC	1	Yatim et al. (1985)
102.851	3.76495	Viverridae	common palm civet	1986	Pahang	forest (<300m)	Ulu Lepar FR	LC	1	Yatim et al. (1986)
102.531	4.5715	Viverridae	common palm civet	1986	Pahang	forest (50-740m)	Taman negara	LC	1	Yatim et al. (1986)
103.457	2.50726	Viverridae	common palm civet	1986	Johor	forest (<300m)	Endau-Rompin	LC	1	Yatim et al. (1986)
101.955	5.02604	Viverridae	common palm civet	1986	Kelantan	forest (300 to >740m)	Sungai Nenggiri	LC	1	Yatim et al. (1986)
101.71	3.13906	Viverridae	common palm civet	1989	Kuala Lumpur	Urban	Jalan Pudu	LC	1	Bukit Ringitt Museum
101.24	3.33355	Viverridae	common palm civet	1989	Selangor	forest (>300m), mangrove	Kuala Selangor	LC	1	Bukit Ringitt Museum
101.631	3.10669	Viverridae	common palm civet	1990	Selangor	Urban	Seyksen 14, Petaling Jaya	LC	1	Bukit Ringitt Museum
101.663	3.24652	Viverridae	common palm civet	1991	Selangor	Urban	Kampung Indah, Selayang Baru	LC	1	Bukit Ringitt Museum
101.771	3.06734	Viverridae	common palm civet	1991	Selangor	Urban	Cheras	LC	1	Bukit Ringitt Museum
101.397	4.468	Viverridae	common palm civet	1993	Pahang	forest (1600m)	Cameron Highlands	LC	1	Mohamad et al. (2015)
100.273	6.68737	Viverridae	common palm civet	1993	Perlis	semi-deciduous forest (<300m)	Mata Ayer FR	LC	1	Sharma (1992)
100.475	4.96734	Viverridae	common palm civet	1994	Perak	oil palm plantation	Kuala Gula oil palm plantation	LC	1	Burhanuddin et al. (1994)
102.905	3.41047	Viverridae	common palm civet	1994	Pahang	forest (<300m)/ swamp	Tasek Cini NR	LC	1	Lim et al. (1999a)
102.307	2.98771	Viverridae	common palm civet	1995	Negeri Sembilan	forest (<300m)/oil palm	Pasoh FR	LC	1	Lim et al. (1995)
104.168	2.76114	Viverridae	common palm civet	1995	Pahang	forest (10-800m)	Pulau Tioman	LC	1	Lim et al. (1999b)
100.968	5.99317	Viverridae	common palm civet	1996	Kedah	forest (300 to >740m)	Ulu Muda FR	LC	1	Norsham et al. (1999)
101.426	5.67301	Viverridae	common palm civet	1998	Perak	forest (50-740m)	North Belum FR	LC	1	Norsham et al. (2000)
101.718	3.54345	Viverridae	common palm civet	1999	Selangor	forest (300 to >740m)	Bukit Kutu WR, Hulu Selangor	LC	1	Lim et al. (1999c)
102.531	4.5715	Viverridae	common palm civet	2000	Pahang	forest (<300m)	Taman negara	LC	1	Kawanishi et al. (1999)
102.13	3.72493	Viverridae	common palm civet	2000	Pahang	forest (300 to >740m)	Krau WR	LC	1	Othman and Lim (2000)
101.534	5.49517	Viverridae	common palm civet	2001	Perak	forest (300 to >740m)	Sungai Singgor, Temenggor FR Hulu Perak	LC	1	Ratnam et al (1995)
103.149	4.93523	Viverridae	common palm civet	2001	Terengganu	forest (50-740m)	Jerengau FR	LC	1	Azlan, Sharma (2006a)
102.053	3.60449	Viverridae	common palm civet	2003	Pahang	forest (<300m)	Lakum FR	LC	1	Lim et al. (2008)
101.861	3.07018	Viverridae	common palm civet	2003	Selangor	forest (50-740m)	Sungai Lalang FR	LC	1	Lim et al. (2009)
101.878	3.12335	Viverridae	common palm civet	2003	Selangor	forest (<300m)	Broga FR	LC	1	Lim et al. (2009)
102.386	3.61871	Viverridae	common palm civet	2007	Pahang	Village	Jenderak Utara, Pahang	LC	1	Bukit Ringitt Museum
102.612	3.13049	Viverridae	common palm civet	2009	Pahang	forest (<300m)/peat swamp	Tasek Bera Ramsar Site	LC	1	Ean (2010)
101.454	5.5773	Viverridae	common palm civet	2010	Perak	forest (300 to >740m)	Belum - Temenggor FR	LC	1	Mohamad et al. (2015)
100.188	6.62833	Viverridae	common palm civet	2011	Perlis	semi deciduous forest (50-740m)	Wang Kelian State Park	LC	1	Jayaraj et al. (2013)
102.55	5.08336	Viverridae	common palm civet	2012	Terengganu	forest (200-740m)	Kenyir Wildlife Corridor	LC	1	Hedges et al. (2013)
102.716	5.19747	Viverridae	common palm civet	2012	Terengganu	forest (200-740m)	Kenyir Wildlife Corridor	LC	1	Hedges et al. (2013)
101.211	3.618	Viverridae	common palm civet	2014	Selangor	peat swamp ( 10-20 m)	Northern Selangor Peat Swamp Forest	LC	1	Sasidhran et al. (2016)
101.781	3.29957	Herpestidae	crab-eating mongoose	1970	Selangor	forest (50-740m)	Ulu Gombak FR	LC	1	Saharudin (1990)
101.714	3.72429	Herpestidae	crab-eating mongoose	1974	Pahang	forest (300 to >740m)	Fraser's Hill	LC	1	Saharudin (1990)
100.273	6.68737	Herpestidae	crab-eating mongoose	1987	Perlis	semi deciduous forest (<300m)	Mata Ayer FR	LC	1	Wells and Francis (1988)
101.211	3.618	Herpestidae	crab-eating mongoose	1990	Selangor	peat swamp ( 10-20 m)	Northern Selangor Peat Swamp Forest	LC	1	Saharudin (1990)
101.817	5.57676	Herpestidae	crab-eating mongoose	2005	Kelantan	forest (50-740m)	Gunung Basor FR	LC	1	Rayan (2007)
100.946	5.08833	Herpestidae	crab-eating mongoose	2005	Perak	forest (300-740m)	Bintang Hijau FR	LC	1	Rayan and Shariff (2008)
101.454	5.5773	Herpestidae	crab-eating mongoose	2010	Perak	forest (300 to >740m)	Belum - Temenggor FR	LC	1	Mohamad et al. (2015)
102.716	5.19747	Herpestidae	crab-eating mongoose	2012	Terengganu	forest (200-740m)	Kenyir Wildlife Corridor	LC	1	Hedges et al. (2013)
102.247	3.67068	Herpestidae	crab-eating mongoose	2013	Pahang	forest (<300m)	Kuala Lompat, Krau WR	LC	1	Ean et al. (2014)
102.531	4.5715	Canidae	dhole	1984	Pahang	forest (50-740m)	Taman negara	EN	4	Yatim et al. (1985)
102.531	4.5715	Canidae	dhole	1986	Pahang	forest (50-740m)	Taman negara	EN	4	Yatim et al. (1986)
101.955	5.02604	Canidae	dhole	1986	Kelantan	forest (300 to >740m)	Sungai Nenggiri	EN	4	Yatim et al. (1986)
102.531	4.5715	Canidae	dhole	2000	Pahang	forest (<300m)	Taman negara	EN	4	Kawanishi et al. (1999)
103.149	4.93523	Canidae	dhole	2001	Terengganu	forest (50-740m)	Jerengau FR	EN	4	Azlan, Sharma (2006a)
101.817	5.57676	Canidae	dhole	2005	Kelantan	forest (50-740m)	Gunung Basor FR	EN	4	Rayan (2007)
101.365	5.34377	Canidae	dhole	2008	Perak	forest (300 to >740m)	Temengor FR	EN	4	Magintan et al. (2010)
101.382	4.05412	Canidae	dhole	2012	Perak	forest (<300m)	Sungkai WR	EN	4	Magintan et al. (2014)
102.612	3.13049	Felidae	flat headed cat	1998	Pahang	peatswamp	Tasek Bera Ramsar Site	EN	4	Lim and Nazim (2005)
103.28	3.39467	Felidae	flat headed cat	2003	Pahang	peatswamp	South East Pahang Peat Swamp Forest	EN	4	Lim and Nazim (2005)
101.874	2.7786	Felidae	flat headed cat	2004	Negeri Sembilan	forest (50-740m)	Gall FR	EN	4	Lim and Nazim (2005)
102.612	3.13049	Felidae	flat headed cat	2009	Pahang	forest (<300m)/peat swamp	Tasek Bera Ramsar Site	EN	4	Ean (2010)
103.344	3.8534	Felidae	flat-headed cat	1953	Pahang	peatswamp	Kuantan, Pahang	EN	4	Lim and Nazim (2005)
101.496	2.79029	Felidae	flat-headed cat	1955	Selangor	Peat swamp	Bukit Jugra Hill, Kuala Langat	EN	4	Lim and Abdul Rahman (1961)
101.781	3.29957	Felidae	flat-headed cat	1957	Selangor	forest (50-740m)	Ulu Gombak FR	EN	4	Lim and Nazim (2005)
103.118	2.85113	Felidae	flat-headed cat	1967	Pahang	forest (<300m)	Upper Sungai Rompin reaches	EN	4	Muul and Lim (1970)
101.597	3.17819	Felidae	flat-headed cat	1968	Selangor	forest (<300m)	Bukit Lanjan	EN	4	Muul and Lim (1970)
101.736	3.71192	Felidae	flat-headed cat	1973	Pahang	forest (1200m)	Fraser Hill	EN	4	Lim and Nazim (2005)
101.844	3.0864	Felidae	flat-headed cat	1973	Selangor	forest (50-740m)	Hulu Langat FR	EN	4	Lim and Nazim (2005)
100.679	4.83427	Felidae	flat-headed cat	1991	Perak	Not described	Taiping	EN	4	Bukit Ringitt Museum
100.91	4.4759	Felidae	flat-headed cat	1991	Perak	chicken farm	Parit Perak	EN	4	Lim and Nazim (2005)
101.366	4.00016	Felidae	flat-headed cat	1993	Perak	Oil palm plantation	Sungai Klah	EN	4	Lim and Nazim (2005)
101.619	3.02975	Felidae	flat-headed cat	1996	Selangor	Urban	Puchong	EN	4	Lim and Nazim (2005)
102.612	3.13049	Felidae	flat-headed cat	1998	Pahang	peat swamp/forest (<300m)	Tasek Bera Ramsar Site	EN	4	Syakirah et al. (2000)
102.13	3.72493	Felidae	flat-headed cat	2000	Pahang	forest (300 to >740m)	Krau WR	EN	4	Othman and Lim (2000)
101.878	3.12335	Felidae	flat-headed cat	2003	Selangor	forest (<300m)	Broga FR	EN	4	Lim et al. (2009)
101.365	5.34377	Felidae	flat-headed cat	2008	Perak	forest (300 to >740m)	Temengor FR	EN	4	Magintan et al. (2010)
101.923	3.34351	Felidae	golden cat	1955	Pahang	forest (300 to >740m)	Janda Baik FR	NT	2	Lim (2002)
101.844	3.0864	Felidae	golden cat	1960	Selangor	forest (50-740m)	Hulu Langat FR	NT	2	Lim (2002)
103.113	2.29657	Felidae	golden cat	1971	Johor	forest (<300m)	Bekok FR	NT	2	Lim (2002)
101.535	2.94078	Felidae	golden cat	1975	Selangor	peat swamp	Bukit Mandol FR	NT	2	Lim (2002)
101.781	3.29957	Felidae	golden cat	1976	Selangor	forest (50-740m)	Ulu Gombak FR	NT	2	Lim (2002)
101.714	3.72429	Felidae	golden cat	1976	Pahang	forest (1200m)	Fraser's Hill waterfall	NT	2	Lim (2002)
101.397	4.468	Felidae	golden cat	1977	Pahang	forest (1600m)	Cameron highlands	NT	2	Lim (2002)
102.307	2.98771	Felidae	golden cat	1989	Negeri Sembilan	forest (<300m)	Pasoh FR	NT	2	Lim (2002)
101.247	5.48596	Felidae	golden cat	1992	Perak	forest (50-740m)	Highway between Gerik and Banding	NT	2	Lim (2002)
101.56	5.49141	Felidae	golden cat	1993	Perak	forest (300 to >740m)	Temenggor FR	NT	2	Lim (2002)
101.56	5.49141	Felidae	golden cat	1994	Perak	forest (300 to >740m)	Temenggor FR	NT	2	Lim (2002)
101.534	5.49517	Felidae	golden cat	1995	Perak	forest (300 to >740m)	Sungai Singgor, Temenggor FR Hulu Perak	NT	2	Ratnam et al (1995)
100.968	5.99317	Felidae	golden cat	1997	Kedah	forest (300 to >740m)	Ulu Muda FR	NT	2	Lim (2002)
101.426	5.67301	Felidae	golden cat	1998	Perak	forest (50-740m)	North Belum FR	NT	2	Norsham et al. (2000)
102.531	4.5715	Felidae	golden cat	2000	Pahang	forest (<300m)	Taman negara	NT	2	Kawanishi et al. (1999)
102.13	3.72493	Felidae	golden cat	2000	Pahang	forest (300 to >740m)	Krau WR	NT	2	Othman and Lim (2000)
103.149	4.93523	Felidae	golden cat	2001	Terengganu	forest (50-740m)	Jerengau FR	NT	2	Azlan, Sharma (2006)
101.817	5.57676	Felidae	golden cat	2005	Kelantan	forest (50-740m)	Gunung Basor FR	NT	2	Rayan (2007)
101.365	5.34377	Felidae	golden cat	2008	Perak	forest (300 to >740m)	Temengor FR	NT	2	Magintan et al. (2010)
103.34	2.53765	Felidae	golden cat	2010	Johor	forest (50-740m)	Northern Endau Rompin NP	NT	2	Gumal et al. (2014)
100.902	4.12234	Mustelidae	hairy-nosed otter	1991	Perak	Peat swamp	Seberang-Perak	EN	4	Sebastian (1995)
103.409	3.45537	Mustelidae	hairy-nosed otter	1994	Pahang	Peat swamp	Nenasi-Pahang	EN	4	Sebastian (1995)
102.132	4.64585	Mustelidae	hairy-nosed otter	2013	Pahang	forest (<300m)	Taman Negara	EN	4	Baker (2013)
101.211	3.618	Herpestidae	Javan mongoose	2014	Selangor	peat swamp ( 10-20 m)	Northern Selangor Peat Swamp Forest	LC	1	Sasidhran et al. (2016)
101.844	3.0864	Viverridae	large Indian civet	1983	Selangor	forest (50-740m)	Hulu Langat	NT	2	Yatim (1983)
102.531	4.5715	Viverridae	large Indian civet	2000	Pahang	forest (<300m)	Taman negara	NT	2	Kawanishi et al. (1999)
103.149	4.93523	Viverridae	large Indian civet	2001	Terengganu	forest (50-740m)	Jerengau FR	NT	2	Azlan, Sharma (2006a)
101.817	5.57676	Viverridae	large Indian civet	2005	Kelantan	forest (50-740m)	Gunung Basor FR	NT	2	Rayan (2007)
101.454	5.5773	Viverridae	large Indian civet	2010	Perak	forest (300 to >740m)	Belum - Temenggor FR	NT	2	Mohamad et al. (2015)
102.55	5.08336	Viverridae	large Indian civet	2012	Terengganu	forest (200-740m)	Kenyir Wildlife Corridor	NT	2	Hedges et al. (2013)
102.716	5.19747	Viverridae	large Indian civet	2012	Terengganu	forest (200-740m)	Kenyir Wildlife Corridor	NT	2	Hedges et al. (2013)
101.211	3.618	Viverridae	large Indian civet	2014	Selangor	peat swamp ( 10-20 m)	Northern Selangor Peat Swamp Forest	NT	2	Sasidhran et al. (2016)
100.712	5.36833	Viverridae	large-spotted civet	2011	Kedah	oil palm plantation (<300m)	Sungai Dingin Palm oil estate	VU	3	Hamirul et al. (2015)
100.712	5.39167	Viverridae	large-spotted civet	2011	Kedah	oil palm plantation (<300m)	Sungai Dingin Palm oil estate	VU	3	Hamirul et al. (2015)
101.128	5.415	Viverridae	large-spotted civet	2014	Perak	oil palm/ settlements (<300m)	Road kill near Gerik, Perak	VU	3	Hamirul et al. (2015)
102.13	3.72493	Felidae	leopard	1968	Pahang	forest (300 to >740m)	Krau WR	NT	2	Medway (1972)
101.718	3.54345	Felidae	leopard	1975	Selangor	forest (300 to >740m)	Bukit Kutu WR, Hulu Selangor	NT	2	Lim et al. (1999c)
103.457	2.50726	Felidae	leopard	1986	Johor	forest (<300m)	Endau-Rompin	NT	2	Yatim et al. (1986)
101.955	5.02604	Felidae	leopard	1986	Kelantan	forest (300 to >740m)	Sungai Nenggiri	NT	2	Yatim et al. (1986)
100.273	6.68737	Felidae	leopard	1995	Perlis	semi-deciduous forest (<300m)	Mata Ayer FR	NT	2	Sharma (1992)
100.968	5.99317	Felidae	leopard	1996	Kedah	forest (300 to >740m)	Ulu Muda FR	NT	2	Norsham et al. (1999)
101.426	5.67301	Felidae	leopard	1998	Perak	forest (50-740m)	North Belum FR	NT	2	Norsham et al. (2000)
101.718	3.54345	Felidae	leopard	1999	Selangor	forest (300 to >740m)	Bukit Kutu WR, Hulu Selangor	NT	2	Lim et al. (1999c)
102.531	4.5715	Felidae	leopard	2000	Pahang	forest (<300m)	Taman negara	NT	2	Kawanishi et al. (1999)
103.149	4.93523	Felidae	leopard	2001	Terengganu	forest (50-740m)	Jerengau FR	NT	2	Azlan, Sharma (2006)
102.053	3.60449	Felidae	leopard	2003	Pahang	forest (<300m)	Lakum FR	NT	2	Lim et al. (2008)
101.534	5.49517	Felidae	leopard	2003	Perak	forest (300 to >740m)	Sungai Singgor, Temenggor FR Hulu Perak	NT	2	Ratnam et al (1995)
101.817	5.57676	Felidae	leopard	2005	Kelantan	forest (50-740m)	Gunung Basor FR	NT	2	Rayan (2007)
101.365	5.34377	Felidae	leopard	2008	Perak	forest (300 to >740m)	Temengor FR	NT	2	Magintan et al. (2010)
103.34	2.53765	Felidae	leopard	2010	Johor	forest (50-740m)	Northern Endau Rompin NP	NT	2	Gumal et al. (2014)
102.55	5.08336	Felidae	leopard	2013	Terengganu	forest (200-740m)	Kenyir Wildlife Corridor	NT	2	Hedges et al. (2015)
101.211	3.618	Felidae	leopard	2014	Selangor	peat swamp ( 10-20 m)	Northern Selangor Peat Swamp Forest	NT	2	Sasidhran et al. (2016)
101.612	3.25879	Felidae	leopard cat	1948	Selangor	forest (50-740m)	Bukit Lagong FR	LC	1	Lim (1999)
101.844	3.0864	Felidae	leopard cat	1953	Selangor	forest (50-740m)	Hulu Langat FR	LC	1	Lim (1999)
101.612	3.25879	Felidae	leopard cat	1954	Selangor	forest (50-740m)	Bukit Lagong FR	LC	1	Lim (1999)
101.844	3.0864	Felidae	leopard cat	1956	Selangor	forest (50-740m)	Hulu Langat FR	LC	1	Lim (1999)
101.844	3.0864	Felidae	leopard cat	1959	Selangor	forest (50-740m)	Hulu Langat FR	LC	1	Lim (1999)
101.781	3.29957	Felidae	leopard cat	1959	Selangor	forest (50-740m)	Ulu Gombak FR	LC	1	Lim (1999)
101.647	3.0205	Felidae	leopard cat	1960	Selangor	forest (<300m)	Ayer Hitam FR	LC	1	Lim (1999)
101.612	3.25879	Felidae	leopard cat	1965	Selangor	forest (50-740m)	Bukit Lagong FR	LC	1	Lim (1999)
101.844	3.0864	Felidae	leopard cat	1968	Selangor	forest (50-740m)	Hulu Langat FR	LC	1	Lim (1999)
101.781	3.29957	Felidae	leopard cat	1968	Selangor	forest (50-740m)	Ulu Gombak FR	LC	1	Lim (1999)
101.781	3.29957	Felidae	leopard cat	1968	Selangor	forest (50-740m)	Ulu Gombak FR	LC	1	Lim (1999)
103.113	2.29657	Felidae	leopard cat	1968	Joho	forest (<300m)	Bekok FR	LC	1	Lim (1999)
102.13	3.72493	Felidae	leopard cat	1968	Pahang	forest (300 to >740m)	Krau WR	LC	1	Medway (1972)
101.612	3.25879	Felidae	leopard cat	1969	Selangor	forest (50-740m)	Bukit Lagong FR	LC	1	Lim (1999)
100.254	5.43551	Felidae	leopard cat	1973	Penang	forest (50-740m)	Penang Hill	LC	1	Lim (1999)
101.601	2.71729	Felidae	leopard cat	1974	Selangor	peat swamp	Banting Malay FR	LC	1	Lim (1999)
103.879	1.82273	Felidae	leopard cat	1974	Johor	forest (<300m)	Kota Tinggi, Johor	LC	1	Lim (1999)
101.601	2.71729	Felidae	leopard cat	1975	Selangor	peat swamp	Banting Malay FR	LC	1	Lim (1999)
101.718	3.54345	Felidae	leopard cat	1975	Selangor	forest (300 to >740m)	Bukit Kutu WR, Hulu Selangor	LC	1	Lim et al. (1999c)
101.601	2.71729	Felidae	leopard cat	1976	Selangor	peat swamp	Banting Malay FR	LC	1	Lim (1999)
101.781	3.29957	Felidae	leopard cat	1977	Selangor	forest (50-740m)	Ulu Gombak FR	LC	1	Lim (1999)
101.771	3.06734	Felidae	leopard cat	1988	Selangor	urban	Batu 9, Cheras	LC	1	Bukit Ringitt Museum
101.24	3.33355	Felidae	leopard cat	1989	Selangor	forest (<300m), mangrove	Kuala Selangor	LC	1	Bukit Ringitt Museum
100.475	4.96734	Felidae	leopard cat	1994	Perak	oil palm plantation	Kuala Gula oil palm plantation	LC	1	Burhanuddin et al. (1994)
102.905	3.41047	Felidae	leopard cat	1994	Pahang	forest (<300m)/ swamp	Tasek Cini NR	LC	1	Lim et al. (1999a)
102.307	2.98771	Felidae	leopard cat	1995	Negeri Sembilan	forest (<300m)/oil palm	Pasoh FR	LC	1	Lim et al. (1995)
100.968	5.99317	Felidae	leopard cat	1996	Kedah	forest (300 to >740m)	Ulu Muda FR	LC	1	Norsham et al. (1999)
101.426	5.67301	Felidae	leopard cat	1998	Perak	forest (50-740m)	North Belum FR	LC	1	Norsham et al. (2000)
102.612	3.13049	Felidae	leopard cat	1998	Pahang	peat swamp/forest (<300m)/secondary forest	Tasek Bera Ramsar Site	LC	1	Syakirah et al. (2000)
102.531	4.5715	Felidae	leopard cat	2000	Pahang	forest (<300m)	Taman negara	LC	1	Kawanishi et al. (1999)
102.13	3.72493	Felidae	leopard cat	2000	Pahang	forest (300 to >740m)	Krau WR	LC	1	Othman and Lim (2000)
103.149	4.93523	Felidae	leopard cat	2001	Terengganu	forest (50-740m)	Jerengau FR	LC	1	Azlan, Sharma (2006)
102.053	3.60449	Felidae	leopard cat	2003	Pahang	forest (<300m)	Lakum FR	LC	1	Lim et al. (2008)
101.861	3.07018	Felidae	leopard cat	2003	Selangor	forest (50-740m)	Sungai Lalang FR	LC	1	Lim et al. (2009)
101.878	3.12335	Felidae	leopard cat	2003	Selangor	forest (<300m)	Broga FR	LC	1	Lim et al. (2009)
101.534	5.49517	Felidae	leopard cat	2004	Perak	forest (300 to >740m)	Sungai Singgor, Temenggor FR Hulu Perak	LC	1	Ratnam et al (1995)
101.817	5.57676	Felidae	leopard cat	2005	Kelantan	forest (50-740m)	Gunung Basor FR	LC	1	Rayan (2007)
101.365	5.34377	Felidae	leopard cat	2008	Perak	forest (300 to >740m)	Temengor FR	LC	1	Magintan et al. (2010)
103.34	2.53765	Felidae	leopard cat	2010	Johor	forest (50-740m)	Northern Endau Rompin NP	LC	1	Gumal et al. (2014)
101.211	3.618	Felidae	leopard cat	2014	Selangor	peat swamp ( 10-20 m)	Northern Selangor Peat Swamp Forest	LC	1	Sasidhran et al. (2016)
102.053	3.60449	Viverridae	little civet	2003	Pahang	forest (<300m)	Lakum FR	LC	1	Lim et al. (2008)
100.648	4.2003	Viverridae	Malay civet	1984	Perak	forest (<300m)/heath forest	Tanjung Hantu FR	LC	1	Yatim (1984)
102.531	4.5715	Viverridae	Malay civet	1984	Pahang	forest (50-740m)	Taman negara	LC	1	Yatim et al. (1985)
101.426	5.67301	Viverridae	Malay civet	1998	Perak	forest (50-740m)	North Belum FR	LC	1	Norsham et al. (2000)
102.612	3.13049	Viverridae	Malay civet	1998	Pahang	secondary forest (<300m)	Tasek Bera Ramsar Site	LC	1	Syakirah et al. (2000)
102.531	4.5715	Viverridae	Malay civet	2000	Pahang	forest (<300m)	Taman negara	LC	1	Kawanishi et al. (1999)
102.13	3.72493	Viverridae	Malay civet	2000	Pahang	forest (300 to >740m)	Krau WR	LC	1	Othman and Lim (2000)
103.149	4.93523	Viverridae	Malay civet	2001	Terengganu	forest (50-740m)	Jerengau FR	LC	1	Azlan, Sharma (2006a)
102.257	3.65343	Viverridae	Malay civet	2007	Pahang	forest (<300m)	Krau WR (southeastern end)	LC	1	Jennings et al. (2010b)
102.55	5.08336	Viverridae	Malay civet	2012	Terengganu	forest (200-740m)	Kenyir Wildlife Corridor	LC	1	Hedges et al. (2013)
101.382	4.05412	Viverridae	Malay civet	2012	Perak	forest (<300m)	Sungkai WR	LC	1	Magintan et al. (2014)
102.406	4.37718	Mustelidae	Malay weasel	1973	Pahang	forest (<300m)	Kuala Tahan, Taman Negara	LC	1	Lim et al. (1989)
101.718	3.54345	Mustelidae	Malay weasel	1975	Selangor	forest (300 to >740m)	Bukit Kutu WR, Hulu Selangor	LC	1	Lim et al. (1999c)
102.905	3.41047	Mustelidae	Malay weasel	1994	Pahang	forest (<300m)/ swamp	Tasek Cini NR	LC	1	Lim et al. (1999a)
102.13	3.72493	Mustelidae	Malay weasel	2000	Pahang	forest (300 to >740m)	Krau WR	LC	1	Othman and Lim (2000)
101.878	3.12335	Mustelidae	Malay weasel	2003	Selangor	forest (<300m)	Broga FR	LC	1	Lim et al. (2009)
101.365	5.34377	Mustelidae	Malay weasel	2008	Perak	forest (300 to >740m)	Temengor FR	LC	1	Magintan et al. (2010)
103.879	1.82273	Felidae	marbled cat	1961	Johor	forest (<300m)	Kota Tinggi, Johor	NT	2	Lim (2001)
101.612	3.25879	Felidae	marbled cat	1964	Selangor	forest (<300m)	Bukit Lagong	NT	2	Lim (2001)
101.736	3.71192	Felidae	marbled cat	1971	Pahang	forest (1200m)	Fraser Hill	NT	2	Lim (2001)
101.211	3.618	Felidae	marbled cat	1976	Selangor	Peat swamp	Northern Selangor Peat Swamp Forest	NT	2	Lim (2001)
101.844	3.0864	Felidae	marbled cat	1983	Selangor	forest (50-740m)	Hulu Langat	NT	2	Yatim (1983)
102.851	3.76495	Felidae	marbled cat	1986	Pahang	forest (<300m)	Ulu Lepar FR	NT	2	Yatim et al. (1986)
101.955	5.02604	Felidae	marbled cat	1986	Kelantan	forest (300 to >740m)	Sungai Nenggiri	NT	2	Yatim et al. (1986)
101.781	3.29957	Felidae	marbled cat	1995	Selangor	forest (800m)	Ulu Gombak FR	NT	2	Lim (2001)
100.188	6.62833	Felidae	marbled cat	1995	Perlis	semi deciduous forest (50-740m)	Assigned to Perlis State Park	NT	2	Lim (2001)
102.531	4.5715	Felidae	marbled cat	2000	Pahang	forest (<300m)	Taman negara	NT	2	Kawanishi et al. (1999)
102.13	3.72493	Felidae	marbled cat	2000	Pahang	forest (300 to >740m)	Krau WR	NT	2	Othman and Lim (2000)
103.149	4.93523	Felidae	marbled cat	2001	Terengganu	forest (50-740m)	Jerengau FR	NT	2	Azlan, Sharma (2006)
101.365	5.34377	Felidae	marbled cat	2008	Perak	forest (300 to >740m)	Temengor FR	NT	2	Magintan et al. (2010)
103.34	2.53765	Felidae	marbled cat	2010	Johor	forest (50-740m)	Northern Endau Rompin NP	NT	2	Gumal et al. (2014)
102.247	3.67068	Viverridae	masked palm civet	1986	Pahang	forest (<300m)	Kuala Lompat, Krau WR	LC	1	Lambert (1990)
102.905	3.41047	Viverridae	masked palm civet	1994	Pahang	forest (<300m)/ swamp	Tasek Cini NR	LC	1	Lim et al. (1999a)
100.273	6.68737	Viverridae	masked palm civet	1994	Perlis	semi-deciduous forest (<300m)	Mata Ayer FR	LC	1	Sharma (1992)
100.968	5.99317	Viverridae	masked palm civet	1996	Kedah	forest (300 to >740m)	Ulu Muda FR	LC	1	Norsham et al. (1999)
101.861	3.07018	Viverridae	masked palm civet	1999	Selangor	forest (<300m)	Sungai Lalang	LC	1	Norsham, Ong (2001)
101.534	5.49517	Viverridae	masked palm civet	1999	Perak	forest (300 to >740m)	Sungai Singgor, Temenggor FR Hulu Perak	LC	1	Ratnam et al (1995)
102.13	3.72493	Viverridae	masked palm civet	2000	Pahang	forest (300 to >740m)	Krau WR	LC	1	Othman and Lim (2000)
103.149	4.93523	Viverridae	masked palm civet	2001	Terengganu	forest (50-740m)	Jerengau FR	LC	1	Azlan, Sharma (2006a)
102.053	3.60449	Viverridae	masked palm civet	2003	Pahang	forest (<300m)	Lakum FR	LC	1	Lim et al. (2008)
101.817	5.57676	Viverridae	masked palm civet	2005	Kelantan	forest (50-740m)	Gunung Basor FR	LC	1	Rayan (2007)
101.454	5.5773	Viverridae	masked palm civet	2010	Perak	forest (300 to >740m)	Belum - Temenggor FR	LC	1	Mohamad et al. (2015)
100.188	6.62833	Viverridae	masked palm civet	2011	Perlis	semi deciduous forest (50-740m)	Wang Kelian State Park	LC	1	Jayaraj et al. (2013)
102.55	5.08336	Viverridae	masked palm civet	2012	Terengganu	forest (200-740m)	Kenyir Wildlife Corridor	LC	1	Hedges et al. (2013)
101.284	3.86319	Viverridae	otter civet	1987	Perak	Peat swamp	Besout FR	EN	4	Abdul (1987)
101.718	3.54345	Herpestidae	short-tailed mongoose	1975	Selangor	forest (300 to >740m)	Bukit Kutu WR, Hulu Selangor	LC	1	Lim et al. (1999c)
102.307	2.98771	Herpestidae	short-tailed mongoose	1995	Negeri Sembilan	forest (<300m)/oil palm	Pasoh FR	LC	1	Lim et al. (1995)
102.053	3.60449	Herpestidae	short-tailed mongoose	2003	Pahang	forest (<300m)	Lakum FR	LC	1	Lim et al. (2008)
101.861	3.07018	Herpestidae	short-tailed mongoose	2003	Selangor	forest (50-740m)	Sungai Lalang FR	LC	1	Lim et al. (2009)
102.257	3.65343	Herpestidae	short-tailed mongoose	2007	Pahang	forest (<300m)	Krau WR (southeastern end)	LC	1	Jennings et al. (2010a)
102.406	4.37718	Mustelidae	small-clawed otter	1973	Pahang	forest (<300m)	Kuala Tahan, Taman Negara	VU	3	Lim et al. (1989)
101.718	3.54345	Mustelidae	small-clawed otter	1975	Selangor	forest (300 to >740m)	Bukit Kutu WR, Hulu Selangor	VU	3	Lim et al. (1999c)
102.391	4.32861	Mustelidae	small-clawed otter	1984	Pahang	forest (<300m)	Sungai Tembeling, Taman Negara	VU	3	Shariff (1984)
100.464	4.98107	Mustelidae	small-clawed otter	1984	Perak	rice fields	Mukim Kuala Kurau	VU	3	Shariff (1985)
102.424	4.66192	Mustelidae	small-clawed otter	1985	Pahang	forest (<300m)	Sungai Keniam, Taman Negara	VU	3	Shariff (1984)
102.316	4.56273	Mustelidae	small-clawed otter	1986	Pahang	forest (<300m)	Sungai Tahan, Taman Negara	VU	3	Shariff (1984)
100.393	5.0722	Mustelidae	small-clawed otter	1989	Perak	rice fields	Tanjun Piandang, Perak	VU	3	Burhanuddin (1989)
102.905	3.41047	Mustelidae	small-clawed otter	1994	Pahang	forest (<300m)/ swamp	Tasek Cini NR	VU	3	Lim et al. (1999a)
102.307	2.98771	Mustelidae	small-clawed otter	1995	Negeri Sembilan	forest (<300m)	Pasoh FR	VU	3	Lim et al. (1995)
100.968	5.99317	Mustelidae	small-clawed otter	1996	Kedah	forest (300 to >740m)	Ulu Muda FR	VU	3	Norsham et al. (1999)
102.612	3.13049	Mustelidae	small-clawed otter	1998	Pahang	peat swamp	Tasek Bera Ramsar Site	VU	3	Syakirah et al. (2000)
101.426	5.67301	Mustelidae	small-clawed otter	1998	Perak	forest (50-740m)	North Belum FR	VU	3	Norsham et al. (2000)
101.718	3.54345	Mustelidae	small-clawed otter	1999	Selangor	forest (300 to >740m)	Bukit Kutu WR, Hulu Selangor	VU	3	Lim et al. (1999c)
102.13	3.72493	Mustelidae	small-clawed otter	2000	Pahang	forest (300 to >740m)	Krau WR	VU	3	Othman and Lim (2000)
102.053	3.60449	Mustelidae	small-clawed otter	2003	Pahang	forest (<300m)	Lakum FR	VU	3	Lim et al. (2008)
101.878	3.12335	Mustelidae	small-clawed otter	2003	Selangor	forest (<300m)	Broga FR	VU	3	Lim et al. (2009)
102.55	5.08336	Mustelidae	small-clawed otter	2012	Terengganu	forest (200-740m)	Kenyir Wildlife Corridor	VU	3	Hedges et al. (2013)
102.13	3.72493	Viverridae	small-toothed palm civet	1968	Pahang	forest (300 to >740m)	Krau WR	LC	1	Medway (1972)
102.406	4.37718	Viverridae	small-toothed palm civet	1973	Pahang	forest (<300m)	Kuala Tahan, Taman Negara	LC	1	Lim et al. (1989)
101.718	3.54345	Viverridae	small-toothed palm civet	1975	Selangor	forest (300 to >740m)	Bukit Kutu WR, Hulu Selangor	LC	1	Lim et al. (1999c)
101.647	3.0205	Viverridae	small-toothed palm civet	1987	Selangor	forest (<300m)	Ayer Hitam FR	LC	1	Ratnam (1987)
102.307	2.98771	Viverridae	small-toothed palm civet	1995	Negeri Sembilan	forest (<300m)	Pasoh FR	LC	1	Lim et al. (1995)
100.968	5.99317	Viverridae	small-toothed palm civet	1996	Kedah	forest (300 to >740m)	Ulu Muda FR	LC	1	Norsham et al. (1999)
101.426	5.67301	Viverridae	small-toothed palm civet	1998	Perak	forest (50-740m)	North Belum FR	LC	1	Norsham et al. (2000)
102.612	3.13049	Viverridae	small-toothed palm civet	1998	Pahang	peat swamp/forest (<300m)	Tasek Bera Ramsar Site	LC	1	Syakirah et al. (2000)
101.718	3.54345	Viverridae	small-toothed palm civet	1999	Selangor	forest (300 to >740m)	Bukit Kutu WR, Hulu Selangor	LC	1	Lim et al. (1999c)
102.13	3.72493	Viverridae	small-toothed palm civet	2000	Pahang	forest (300 to >740m)	Krau WR	LC	1	Othman and Lim (2000)
101.534	5.49517	Viverridae	small-toothed palm civet	2000	Perak	forest (300 to >740m)	Sungai Singgor, Temenggor FR Hulu Perak	LC	1	Ratnam et al (1995)
102.053	3.60449	Viverridae	small-toothed palm civet	2003	Pahang	forest (<300m)	Lakum FR	LC	1	Lim et al. (2008)
101.861	3.07018	Viverridae	small-toothed palm civet	2003	Selangor	forest (50-740m)	Sungai Lalang FR	LC	1	Lim et al. (2009)
102.716	5.19747	Viverridae	small-toothed palm civet	2012	Terengganu	forest (200-740m)	Kenyir Wildlife Corridor	LC	1	Hedges et al. (2013)
100.493	4.92455	Mustelidae	smooth otter	1984	Perak	mangrove	Kuala Gula Mangrove swamp	VU	3	Shariff (1984)
102.391	4.32861	Mustelidae	smooth otter	1984	Pahang	forest (<300m)	Sungai Tembeling, Taman Negara	VU	3	Shariff (1984)
100.464	4.98107	Mustelidae	smooth otter	1984	Perak	rice fields	Mukim Kuala Kurau	VU	3	Shariff (1985)
99.8425	6.46432	Mustelidae	smooth otter	1984	Kedah	mangroves	Langkawi	VU	3	Shariff (1985)
100.648	4.2003	Mustelidae	smooth otter	1984	Perak	forest (<300m)/heath forest	Tanjung Hantu FR	VU	3	Yatim (1984)
102.531	4.5715	Mustelidae	smooth otter	1984	Pahang	forest (50-740m)	Taman negara	VU	3	Yatim et al. (1985)
102.747	4.81787	Mustelidae	smooth otter	1984	Terenganu	forest (50-740m)	Kenyir Dam	VU	3	Yatim et al. (1985)
102.424	4.66192	Mustelidae	smooth otter	1985	Pahang	forest (<300m)	Sungai Keniam, Taman Negara	VU	3	Shariff (1984)
102.316	4.56273	Mustelidae	smooth otter	1986	Pahang	forest (<300m)	Sungai Tahan, Taman Negara	VU	3	Shariff (1984)
100.393	5.0722	Mustelidae	smooth otter	1990	Perak	rice fields	Tanjun Piandang, Perak	VU	3	Burhanuddin (1989)
100.475	4.96734	Mustelidae	smooth otter	1994	Perak	oil palm plantation	Kuala Gula oil palm plantation	VU	3	Burhanuddin et al. (1994)
101.534	5.49517	Mustelidae	smooth otter	1997	Perak	forest (300 to >740m)	Sungai Singgor, Temenggor FR Hulu Perak	VU	3	Ratnam et al (1995)
101.426	5.67301	Mustelidae	smooth otter	1998	Perak	forest (50-740m)	North Belum FR	VU	3	Norsham et al. (2000)
102.612	3.13049	Mustelidae	smooth otter	1998	Pahang	peat swamp	Tasek Bera Ramsar Site	VU	3	Syakirah et al. (2000)
101.365	5.34377	Mustelidae	smooth otter	2008	Perak	forest (300 to >740m)	Temengor FR	VU	3	Magintan et al. (2010)
102.55	5.08336	Mustelidae	smooth otter	2012	Terengganu	forest (200-740m)	Kenyir Wildlife Corridor	VU	3	Hedges et al. (2013)
102.13	3.72493	Ursidae	sun bear	1968	Pahang	forest (300 to >740m)	Krau WR	VU	3	Medway (1972)
101.718	3.54345	Ursidae	sun bear	1975	Selangor	forest (300 to >740m)	Bukit Kutu WR, Hulu Selangor	VU	3	Lim et al. (1999c)
101.844	3.0864	Ursidae	sun bear	1983	Selangor	forest (50-740m)	Hulu Langat	VU	3	Yatim (1983)
100.648	4.2003	Ursidae	sun bear	1984	Perak	forest (<300m)/heath forest	Tanjung Hantu FR	VU	3	Yatim (1984)
102.531	4.5715	Ursidae	sun bear	1984	Pahang	forest (50-740m)	Taman negara	VU	3	Yatim et al. (1985)
102.747	4.81787	Ursidae	sun bear	1984	Terenganu	forest (50-740m)	Kenyir Dam	VU	3	Yatim et al. (1985)
102.531	4.5715	Ursidae	sun bear	1986	Pahang	forest (50-740m)	Taman negara	VU	3	Yatim et al. (1986)
103.457	2.50726	Ursidae	sun bear	1986	Johor	forest (<300m)	Endau-Rompin	VU	3	Yatim et al. (1986)
101.955	5.02604	Ursidae	sun bear	1986	Kelantan	forest (300 to >740m)	Sungai Nenggiri	VU	3	Yatim et al. (1986)
102.212	4.12661	Ursidae	sun bear	1992	Pahang	forest (<300m)	Lesong	VU	3	Laidlaw (2000)
101.861	3.07018	Ursidae	sun bear	1992	Selangor	forest (<300m)	Sungai Lalang	VU	3	Laidlaw (2000)
102.306	3.42067	Ursidae	sun bear	1992	Pahang	forest (<300m)	Kemasul	VU	3	Laidlaw (2000)
100.273	6.68737	Ursidae	sun bear	1992	Perlis	semi-deciduous forest (<300m)	Mata Ayer FR	VU	3	Sharma (1992)
102.905	3.41047	Ursidae	sun bear	1994	Pahang	forest (<300m)/ swamp	Tasek Cini NR	VU	3	Lim et al. (1999a)
102.13	3.72493	Ursidae	sun bear	1995	Pahang	forest (>1000m)	Krau WR	VU	3	Kassim et al. (1999)
100.968	5.99317	Ursidae	sun bear	1996	Kedah	forest (300 to >740m)	Ulu Muda FR	VU	3	Norsham et al. (1999)
101.534	5.49517	Ursidae	sun bear	1996	Perak	forest (300 to >740m)	Sungai Singgor, Temenggor FR Hulu Perak	VU	3	Ratnam et al (1995)
101.426	5.67301	Ursidae	sun bear	1998	Perak	forest (50-740m)	North Belum FR	VU	3	Norsham et al. (2000)
101.718	3.54345	Ursidae	sun bear	1999	Selangor	forest (300 to >740m)	Bukit Kutu WR, Hulu Selangor	VU	3	Lim et al. (1999c)
101.861	3.07018	Ursidae	sun bear	1999	Selangor	forest (<300m)	Sungai Lalang	VU	3	Norsham, Ong (2001)
102.531	4.5715	Ursidae	sun bear	2000	Pahang	forest (<300m)	Taman negara	VU	3	Kawanishi et al. (1999)
103.149	4.93523	Ursidae	sun bear	2001	Terengganu	forest (50-740m)	Jerengau FR	VU	3	Azlan, Sharma (2006a)
102.053	3.60449	Ursidae	sun bear	2003	Pahang	forest (<300m)	Lakum FR	VU	3	Lim et al. (2008)
101.817	5.57676	Ursidae	sun bear	2005	Kelantan	forest (50-740m)	Gunung Basor FR	VU	3	Rayan (2007)
101.365	5.34377	Ursidae	sun bear	2008	Perak	forest (300 to >740m)	Temengor FR	VU	3	Magintan et al. (2010)
102.612	3.13049	Ursidae	sun bear	2009	Pahang	forest (<300m)/peat swamp	Tasek Bera Ramsar Site	VU	3	Ean (2010)
101.211	3.618	Ursidae	sun bear	2014	Selangor	peat swamp ( 10-20 m)	Northern Selangor Peat Swamp Forest	VU	3	Sasidhran et al. (2016)
102.13	3.72493	Felidae	tiger	1968	Pahang	forest (300 to >740m)	Krau WR	CE	4	Medway (1972)
101.718	3.54345	Felidae	tiger	1975	Selangor	forest (300 to >740m)	Bukit Kutu WR, Hulu Selangor	CE	4	Lim et al. (1999c)
100.648	4.2003	Felidae	tiger	1984	Perak	forest (<300m)/heath forest	Tanjung Hantu FR	CE	4	Yatim (1984)
102.531	4.5715	Felidae	tiger	1984	Pahang	forest (50-740m)	Taman negara	CE	4	Yatim et al. (1985)
102.747	4.81787	Felidae	tiger	1984	Terenganu	forest (50-740m)	Kenyir Dam	CE	4	Yatim et al. (1985)
102.851	3.76495	Felidae	tiger	1986	Pahang	forest (<300m)	Ulu Lepar FR	CE	4	Yatim et al. (1986)
102.531	4.5715	Felidae	tiger	1986	Pahang	forest (50-740m)	Taman negara	CE	4	Yatim et al. (1986)
101.955	5.02604	Felidae	tiger	1986	Kelantan	forest (300 to >740m)	Sungai Nenggiri	CE	4	Yatim et al. (1986)
102.212	4.12661	Felidae	tiger	1992	Pahang	forest (<300m)	Lesong	CE	4	Laidlaw (2000)
102.905	3.41047	Felidae	tiger	1994	Pahang	forest (<300m)/ swamp	Tasek Cini NR	CE	4	Lim et al. (1999a)
102.13	3.72493	Felidae	tiger	1996	Pahang	forest (>1000m)	Krau WR	CE	4	Kassim et al. (1999)
100.968	5.99317	Felidae	tiger	1996	Kedah	forest (300 to >740m)	Ulu Muda FR	CE	4	Norsham et al. (1999)
101.426	5.67301	Felidae	tiger	1998	Perak	forest (50-740m)	North Belum FR	CE	4	Norsham et al. (2000)
101.718	3.54345	Felidae	tiger	1999	Selangor	forest (300 to >740m)	Bukit Kutu WR, Hulu Selangor	CE	4	Lim et al. (1999c)
101.56	5.49141	Felidae	tiger	1999	Perak	forest (50-740m)	Temenggor FR	CE	4	Lynam et al. (2007)
100.936	5.3737	Felidae	tiger	1999	Perak	forest (50-740m)	Bintang Hijau	CE	4	Lynam et al. (2007)
102.61	5.5666	Felidae	tiger	1999	Terengganu	forest (50-740m)	Gunung Tebu	CE	4	Lynam et al. (2007)
102.186	5.42745	Felidae	tiger	1999	Kelantan	forest (<300m)	Ulu Temiang	CE	4	Lynam et al. (2007)
101.987	5.72326	Felidae	tiger	1999	Kelantan	forest (<300m)	Ayer Ngah	CE	4	Lynam et al. (2007)
102.861	3.53217	Felidae	tiger	1999	Pahang	forest (<300m)	Lepar	CE	4	Lynam et al. (2007)
102.531	4.5715	Felidae	tiger	2000	Pahang	forest (<300m)	Taman negara	CE	4	Kawanishi et al. (1999)
103.149	4.93523	Felidae	tiger	2001	Terengganu	forest (50-740m)	Jerengau FR	CE	4	Azlan, Sharma (2006)
101.534	5.49517	Felidae	tiger	2002	Perak	forest (300 to >740m)	Sungai Singgor, Temenggor FR Hulu Perak	CE	4	Ratnam et al (1995)
102.053	3.60449	Felidae	tiger	2003	Pahang	forest (<300m)	Lakum FR	CE	4	Lim et al. (2008)
101.817	5.57676	Felidae	tiger	2005	Kelantan	forest (50-740m)	Gunung Basor FR	CE	4	Rayan (2007)
101.365	5.34377	Felidae	tiger	2008	Perak	forest (300 to >740m)	Temengor FR	CE	4	Magintan et al. (2010)
102.612	3.13049	Felidae	tiger	2009	Pahang	forest (<300m)/peat swamp	Tasek Bera Ramsar Site	CE	4	Ean (2010)
103.34	2.53765	Felidae	tiger	2010	Johor	forest (50-740m)	Northern Endau Rompin NP	CE	4	Gumal et al. (2014)
101.426	5.67301	Felidae	tiger	2011	Perak	forest (300 to >740m)	Belum FR	CE	4	Rayan, Linkie (2015)
101.56	5.49141	Felidae	tiger	2011	Perak	forest (300 to >740m)	Temenggor FR	CE	4	Rayan, Linkie (2015)
102.531	4.5715	Mustelidae	yellow-throated marten	1986	Pahang	forest (50-740m)	Taman negara	LC	1	Yatim et al. (1986)
102.212	4.12661	Mustelidae	yellow-throated marten	1992	Pahang	forest (<300m)	Lesong	LC	1	Laidlaw (2000)
102.306	3.42067	Mustelidae	yellow-throated marten	1992	Pahang	forest (<300m)	Kemasul	LC	1	Laidlaw (2000)
102.536	3.70808	Mustelidae	yellow-throated marten	1992	Pahang	forest (<300m)	Jengka	LC	1	Laidlaw (2000)
101.534	5.49517	Mustelidae	yellow-throated marten	1995	Perak	forest (300 to >740m)	Sungai Singgor, Temenggor FR Hulu Perak	LC	1	Ratnam et al (1995)
100.968	5.99317	Mustelidae	yellow-throated marten	1996	Kedah	forest (300 to >740m)	Ulu Muda FR	LC	1	Norsham et al. (1999)
102.531	4.5715	Mustelidae	yellow-throated marten	2000	Pahang	forest (<300m)	Taman negara	LC	1	Kawanishi et al. (1999)
102.13	3.72493	Mustelidae	yellow-throated marten	2000	Pahang	forest (300 to >740m)	Krau WR	LC	1	Othman and Lim (2000)
103.149	4.93523	Mustelidae	yellow-throated marten	2001	Terengganu	forest (50-740m)	Jerengau FR	LC	1	Azlan, Sharma (2006a)
102.053	3.60449	Mustelidae	yellow-throated marten	2003	Pahang	forest (<300m)	Lakum FR	LC	1	Lim et al. (2008)
101.817	5.57676	Mustelidae	yellow-throated marten	2005	Kelantan	forest (50-740m)	Gunung Basor FR	LC	1	Rayan (2007)
101.365	5.34377	Mustelidae	yellow-throated marten	2008	Perak	forest (300 to >740m)	Temengor FR	LC	1	Magintan et al. (2010)
101.454	5.5773	Mustelidae	yellow-throated marten	2010	Perak	forest (300 to >740m)	Belum - Temenggor FR	LC	1	Mohamad et al. (2015)
102.55	5.08336	Mustelidae	yellow-throated marten	2012	Terengganu	forest (200-740m)	Kenyir Wildlife Corridor	LC	1	Hedges et al. (2013)
102.716	5.19747	Mustelidae	yellow-throated marten	2012	Terengganu	forest (200-740m)	Kenyir Wildlife Corridor	LC	1	Hedges et al. (2013)
